# Supplementary material for: Optimizing multi-environment trials in the Southern US Rice belt via smart-climate-soil prediction-based models and economic importance
Source: Front Plant Sci. 2024 Oct 23;15:1458701. doi: 10.3389/fpls.2024.1458701 (PMC11537932; doi:10.3389/fpls.2024.1458701)
Supplement: Supplementary Table 2 — Variance components partitioning among year, location, genotype, and genotype-by-environment effects using a random model. [file Table2.xlsx]

## Sheet: Página1
Vg	Vy	Ve	Vge	Vu	VgScaled	VyScaled	VeScaled	VgeScaled	VuScaled
808386	18854.5	1.0195e+06	164127	4.25021e+10	0.353784	0.00825151	0.446175	0.071829	18600.7
Vg = Genotype variance component
Vy = Year variance component
Ve = Environment variance component
Vge = Genotype-by-environment component
Vu = Residual variance
VgScaled = Scaled genotype variance component
VyScaled = Scaled year variance component
VeScaled = Scaled environment variance component
VgeScaled = Scaled genotype-by-environment component
VuScaled = Scaled residual variance
