# Supplementary material for: Optimizing multi-environment trials in the Southern US Rice belt via smart-climate-soil prediction-based models and economic importance
Source: Front Plant Sci. 2024 Oct 23;15:1458701. doi: 10.3389/fpls.2024.1458701 (PMC11537932; doi:10.3389/fpls.2024.1458701)
Supplement: Supplementary Table 3 — Number of trials per experimental site at LSU over ten years at various stages of the breeding program. [file Table3.xlsx]

## Sheet: TableS3
Name	Lat	Long	Trials
Bay City	29.0129	-95.9741	2
Desha County	33.6288	-91.4331	2
Iowa	30.2188	-93.0693	11
Lake Arthur	30.0526	-92.6468	39
Lawrence County	36.0475	-91.0224	2
Mamou	30.6407	-92.4488	28
Mowata	30.4078	-92.3729	21
Nutrien Rice Breeding Station	29.0573	-96.2657	2
Palmetto	30.7956	-91.8991	14
Pine Tree Research Station	35.1253	-90.931	4
Rice Research Station	30.2418	-92.3458	626
Rice Research Station - Late	30.2457	-92.3535	13
Rice Research Station South	30.1799	-92.3553	22
St. Joseph	31.9441	-91.2324	18
UA Northeast Rice Res & Ext Ctr	35.6502	-90.7123	2
UA Rice Res and Ext Center	34.4756	-91.4842	6
Winnsboro	32.1383	-91.69	15
Wintermann Rice Research Station	29.6212	-96.366	2
