# Supplementary material for: Optimizing multi-environment trials in the Southern US Rice belt via smart-climate-soil prediction-based models and economic importance
Source: Front Plant Sci. 2024 Oct 23;15:1458701. doi: 10.3389/fpls.2024.1458701 (PMC11537932; doi:10.3389/fpls.2024.1458701)
Supplement: Supplementary Table 4 — A table containing the heritability of all scenarios (MET, MET_EC, WC_MET and OPT_MET), as well as the variance components of the random effects. [file Table4.xlsx]

## Sheet: Página1
	Vg	Vge	Vu	VgScaled	VgeScaled	VuScaled	H.cullis	Scenario
MET
1	808426	165094	4.24226e+10	0.353801	0.0722522	18565.9	0.965934	MET
1	728574	168012	5.28693e+10	0.318855	0.0735291	23137.8	0.893033	MET_EC
MET by cluster
1	771641	74580.5	3.38062e+10	0.462378	0.0446896	20257.1	0.891159	WC_MET
2	873104	0	9.01923e+10	0.380657	0	39322.1	0.778853	WC_MET
3	994241	272137	3.02454e+10	0.483485	0.132336	14707.9	0.899883	WC_MET
4	589184	181726	2.77192e+10	0.417753	0.12885	19653.9	0.756606	WC_MET
5	763635	131401	4.82779e+10	0.412492	0.0709789	26078.3	0.87524	WC_MET
MET by replicate
1	902809	108163	36937421850338	0.465632	0.0557859	19050.8	0.915809	OPT_MET
2	852517	122579	6.251e+10	0.380776	0.0547496	27920	0.890995	OPT_MET
3	893748	204587	3.39368e+10	0.34323	0.0785683	13032.9	0.886845	OPT_MET
4	787617	231873	2.774e+10	0.343561	0.101144	12100.3	0.882714	OPT_MET
5	783103	122551	5.87044e+10	0.352279	0.0551297	26408.2	0.889832	OPT_MET
6	613536	126879	3.75958e+10	0.305492	0.0631756	18719.7	0.886247	OPT_MET
7	727096	271539	1.71803e+10	0.341234	0.127436	8062.9	0.880843	OPT_MET
8	651961	58769.3	5.2196e+10	0.420137	0.0378722	33636.1	0.883665	OPT_MET
9	654708	171713	2.06946e+10	0.387073	0.101519	12234.9	0.884847	OPT_MET
10	1.06398e+06	123051	41503965491713	0.401034	0.0463804	15643.7	0.926565	OPT_MET
MET = Multi environment trial analysis
Vg = Genotype variance component
Vge = Genotype-by-environment component
Vu = Residual variance
VgScaled = Scaled genotype variance component
VgeScaled = Scaled genotype-by-environment component
VuScaled = Scaled residual variance
H.cullis = Cullis heritability
Scenario = MET scenario
